# Supplementary material for: LAG-3 Expression Predicts Outcome in Stage II Colon Cancer
Source: MDPI journal article supplement (doi:10.3390/jpm11080749), 2021-07-30
Supplement: s1 [file s1]

**Supplementary Table S1. Baseline characteristics**

| Feature                       |            | Total             |
|-------------------------------|------------|-------------------|
| Age, years (n=141)            | Median     | 70 (range, 24-98) |
| Gender (n=142)                | Male       | 82 (57.8)         |
|                               | Female     | 60 (42.2)         |
| pT (n=141)                    | pT3        | 121 (85.8)        |
|                               | pT4        | 20 (14.2)         |
| Tumor grade (n=134)           | G1/G2      | 122 (91.0)        |
|                               | G3         | 12 (9.0)          |
| EMVI (n=135)                  | V0         | 118 (87.4)        |
|                               | V1         | 17 (12.6)         |
| Tumor location (n=139)        | Left       | 73 (52.5)         |
|                               | Right      | 66 (47.5)         |
| Lymph node yield (n=142)      | ≥12        | 124 (87.3)        |
|                               | <12        | 18 (12.7)         |
| Tumor budding (ITBCC) (n=142) | Median     | 10 (range, 0-74)  |
| MMR status (n=134)            | deficient  | 33 (24.6)         |
|                               | proficient | 101 (75.4)        |

Data are presented as n (%), unless otherwise stated. Abbreviations: pT = pathological T stage (TNM classification system); EMVI = extramural vascular invasion; ITBCC = International Tumor Budding Consensus Conference.
